# Supplementary material for: The Use of Telerehabilitation Technologies for Cardiac Patients to Improve Rehabilitation Activities and Unify Organizations: Qualitative Study
Source: PubMed Central journal article supplement (PMC6277831; doi:10.2196/10758), 2018-11-19
Supplement: rehab_v5i2e10758_app2.pdf [file rehab_v5i2e10758_app2.pdf]

## **Appendix 2: Observation guide**

### **Themes for observations**

1. Interaction between healthcare professionals across sectors
  - a. Dialogue on specific patient cases
  - b. Communication between professional staff (controversies, meetings, e-rehabilitation plan)
  - c. Verbal and non-verbal communication
  - d. Knowledge-sharing within the interdisciplinary cardiac team (meetings, e-rehabilitation plan)
  
2. Interaction between patients and healthcare professionals
  - a. Dialogue with patient (phone, e-rehabilitation plan)
  - b. Interaction (verbal/non-verbal) between patient and healthcare professional at out-patient clinic
