# Supplementary material for: The Use of Telerehabilitation Technologies for Cardiac Patients to Improve Rehabilitation Activities and Unify Organizations: Qualitative Study
Source: PubMed Central journal article supplement (PMC6277831; doi:10.2196/10758), 2018-11-19
Supplement: rehab_v5i2e10758_app3.pdf [file rehab_v5i2e10758_app3.pdf]

## **Appendix 3: Interview guides, phases I and II**

### **Phase I (November to December 2012)**

1. Mutual presentation
2. Can you describe your experience with cardiac rehabilitation?
3. What are the possibilities and challenges within interprofessional co-operation across sectors in the area of cardiac rehabilitation? (meetings, written communication between professionals and with patients)
  - Communication on specific patients' cases
  - Relations between professionals
  - Task solving
  - Knowledge-sharing between professional groups
4. Other issues for consideration or reflections on inter-organizational co-operation within cardiac rehabilitation?

### **Phase II (December 2013 to January 2014)**

1. Mutual presentation
2. What have you experienced with co-operation within the Teledialog Telerehabilitation program?
  - Communication on specific patients' cases
  - Relations between professionals
  - Task solving
  - Knowledge-sharing between professional groups
3. What are the advantages and disadvantages of the e-rehabilitation plan across sectors between healthcare professionals?
  - Workflows
  - Communication
  - Coordination on tasks
  - Relations
  - Controversies between healthcare professionals
4. Other emerging issues for consideration or reflections on inter organizational co-operation within telerehabilitation?
